# Supplementary material
Source: PubMed Central journal article supplement (PMC5705816)
Supplement: MCB.00156-17_zmb999101662s1.pdf [file MCB.00156-17_zmb999101662s1.pdf]

| <b>Strain List</b> |                                                   |                                                                  |                |                                    |
|--------------------|---------------------------------------------------|------------------------------------------------------------------|----------------|------------------------------------|
| <b>name</b>        | <b>genotype</b>                                   | <b>plasmid</b>                                                   | <b>figures</b> | <b>reference</b>                   |
| BY4741             | MATa his3Δ1 leu2Δ0 met15Δ0 ura3Δ0                 |                                                                  |                | (Brachmann, Davies et al., 1998)   |
| TP2830             | MATa his3Δ1 leu2Δ0 met15Δ0 ura3Δ0                 | pRS313 (Sikorski & Hieter, 1989)                                 | 2A, 3C         | (Fu, Chow et al., 2014)            |
| TP2012             | MATa his3Δ1 leu2Δ0 met15Δ0 ura3Δ0 sae2::KMX       |                                                                  |                | (Winzeler, Shoemaker et al., 1999) |
| TP3472             | MATa his3Δ1 leu2Δ0 met15Δ0 ura3Δ0 sae2::KMX       | pTP1496 (wild-type Flag-SAE2 in pRS313)                          | 2A, 3C         | (Fu et al., 2014)                  |
| TP7572             | MATa his3Δ1 leu2Δ0 met15Δ0 ura3Δ0 sae2::KMX       | pTP3683 (L58P/A59P Flag-SAE2 in pRS313)                          | 2A             | this study                         |
| TP7573             | MATa his3Δ1 leu2Δ0 met15Δ0 ura3Δ0 sae2::KMX       | pTP3684 (I96P Flag-SAE2 in pRS313)                               | 2A             | this study                         |
| TP7574             | MATa his3Δ1 leu2Δ0 met15Δ0 ura3Δ0 sae2::KMX       | pTP3685 (E161P/K163P Flag-SAE2 in pRS313)                        | 2A, 3C         | this study                         |
| TP7575             | MATa his3Δ1 leu2Δ0 met15Δ0 ura3Δ0 sae2::KMX       | pTP3700 (D285P/K288P Flag-SAE2 in pRS313)                        | 2A, 3C         | this study                         |
| TP7576             | MATa his3Δ1 leu2Δ0 met15Δ0 ura3Δ0 sae2::KMX       | pTP3686 (I292/ I293P Flag-SAE2 in pRS313)                        | 2A             | this study                         |
| TP7785             | MATa his3Δ1 leu2Δ0 met15Δ0 ura3Δ0 sae2::KMX       | pTP3789 (L338P/L339P Flag-SAE2 in pRS313)                        | 2A             | this study                         |
| TP7786             | MATa his3Δ1 leu2Δ0 met15Δ0 ura3Δ0 sae2::KMX       | pTP3790 (D285P/K288P/I292P/I293P Flag-SAE2 in pRS313)            | 2A             | this study                         |
| TP7896             | MATa his3Δ1 leu2Δ0 met15Δ0 ura3Δ0 sae2::KMX       | pTP3870 (E161P/K163P/D285P/K288P Flag-SAE2 in pRS313)            | 3C             | this study                         |
| TP3352             | MATa his3Δ1 leu2Δ0 met15Δ0 ura3Δ0 sae2::KMX       | wild-type Flag-SAE2 in 2μ pRS425 (Kim, Vijayakumar et al., 2008) | 2B             | (Fu et al., 2014)                  |
| TP3540             | MATa his3Δ1 leu2Δ0 met15Δ0 ura3Δ0 sae2::KMX       | pRS425 (Christianson, Sikorski et al., 1992)                     | 2B             | (Fu et al., 2014)                  |
| TP7610             | MATa his3Δ1 leu2Δ0 met15Δ0 ura3Δ0 sae2::KMX       | pTP3733 (D285P/K288P Flag-SAE2 in 2μ pRS425)                     | 2B             | this study                         |
| TP7611             | MATa his3Δ1 leu2Δ0 met15Δ0 ura3Δ0 sae2::KMX       | pTP3752 (I292/ I293P Flag-SAE2 in 2μ pRS425)                     | 2B             | this study                         |
| TP7612             | MATa his3Δ1 leu2Δ0 met15Δ0 ura3Δ0 sae2::KMX       | pTP3753 (D285P/K288P/I292P/I293P Flag-SAE2 in 2μ pRS425)         | 2B             | this study                         |
| TP7613             | MATa his3Δ1 leu2Δ0 met15Δ0 ura3Δ0 sae2::KMX       | pTP3734 (L338P/L339P Flag-SAE2 in 2μ pRS425)                     | 2B             | this study                         |
| JLC501/<br>TP6444  | MATa his3Δ1 leu2Δ0 lys2Δ0 ura3Δ0 dna2-1           |                                                                  | 2C             | (Budd & Campbell, 1995)            |
| JLC502/<br>TP6445  | MATa his3Δ1 leu2Δ0 lys2Δ0 ura3Δ0 dna2-1 sae2::KMX |                                                                  | 2C             | this study                         |
| JLC503             | MATa his3Δ1 leu2Δ0 lys2Δ0 ura3Δ0 sae2::KMX        |                                                                  | 2C             | this study                         |
| TP7798             | MATa his3Δ1 leu2Δ0 lys2Δ0 ura3Δ0 dna2-1           | pRS313 (Sikorski & Hieter, 1989)                                 | 2D             | this study                         |
| TP7799             | MATa his3Δ1 leu2Δ0 lys2Δ0 ura3Δ0 dna2-1 sae2::KMX | pRS313 (Sikorski & Hieter, 1989)                                 | 2D             | this study                         |
| TP7800             | MATa his3Δ1 leu2Δ0 lys2Δ0 ura3Δ0 dna2-1 sae2::KMX | pTP1496 (wild-type Flag-SAE2 in pRS313)                          | 2D             | this study                         |
| TP7801             | MATa his3Δ1 leu2Δ0 lys2Δ0 ura3Δ0 dna2-1 sae2::KMX | pTP3683 (L58P/A59P Flag-SAE2 in pRS313)                          | 2D             | this study                         |
| TP7802             | MATa his3Δ1 leu2Δ0 lys2Δ0 ura3Δ0 dna2-1 sae2::KMX | pTP3684 (I96P Flag-SAE2 in pRS313)                               | 2D             | this study                         |

|         |                                                                                                                  |                                                          |    |                                |
|---------|------------------------------------------------------------------------------------------------------------------|----------------------------------------------------------|----|--------------------------------|
| TP7803  | MAT $\alpha$ his3 $\Delta$ 1 leu2 $\Delta$ 0 lys2 $\Delta$ 0 ura3 $\Delta$ 0 dna2-1 sae2::KMX                    | pTP3685 (E161P/K163P Flag-SAE2 in pRS313)                | 2D | this study                     |
| TP7804  | MAT $\alpha$ his3 $\Delta$ 1 leu2 $\Delta$ 0 lys2 $\Delta$ 0 ura3 $\Delta$ 0 dna2-1 sae2::KMX                    | pTP3700 (D285P/K288P Flag-SAE2 in pRS313)                | 2D | this study                     |
| TP6553  | mre11-125 pif1::HIS3 bar1::KanMX dna2::KanMX                                                                     |                                                          | 2E | (Budd & Campbell, 2009)        |
| TP6448  | MAT $\alpha$ his3 $\Delta$ 1 leu2 $\Delta$ 0 met15 $\Delta$ 0 ura3 $\Delta$ 0 dna2::KanMX pif1::HIS3             |                                                          | 2E | (Budd & Campbell, 2009)        |
| TP6450  | MAT $\alpha$ his3 $\Delta$ 1 leu2 $\Delta$ 0 met15 $\Delta$ 0 ura3 $\Delta$ 0 mre11::natR pif1::HIS3 bar1::KanMX |                                                          | 2E | (Budd & Campbell, 2009)        |
| TP6446  | MAT $\alpha$ his3 $\Delta$ 1 leu2 $\Delta$ 0 met15 $\Delta$ 0 ura3 $\Delta$ 0 pif1::HIS3                         |                                                          | 2E | (Budd & Campbell, 2009)        |
| LSY1397 | MAT $\alpha$ RAD5 leu2-3,112 trp1-1 ura3 can1 his3-11,15 ade2-1 mre11-H125N                                      |                                                          | 3A | (Krogh, Llorente et al., 2005) |
| TP7769  | MAT $\alpha$ RAD5 leu2-3,112 trp1-1 ura3 can1 his3-11,15 ade2-1 mre11-H125N                                      | pRS313 (Sikorski & Hieter, 1989)                         | 3A | this study                     |
| TP7770  | MAT $\alpha$ RAD5 leu2-3,112 trp1-1 ura3 can1 his3-11,15 ade2-1 mre11-H125N sae2::URA3                           | pRS313 (Sikorski & Hieter, 1989)                         | 3A | this study                     |
| TP7771  | MAT $\alpha$ RAD5 leu2-3,112 trp1-1 ura3 can1 his3-11,15 ade2-1 mre11-H125N sae2::URA3                           | pTP1496 (wild-type Flag-SAE2 in pRS313)                  | 3A | this study                     |
| TP7772  | MAT $\alpha$ RAD5 leu2-3,112 trp1-1 ura3 can1 his3-11,15 ade2-1 mre11-H125N sae2::URA3                           | pTP3683 (L58P/A59P Flag-SAE2 in pRS313)                  | 3A | this study                     |
| TP7773  | MAT $\alpha$ RAD5 leu2-3,112 trp1-1 ura3 can1 his3-11,15 ade2-1 mre11-H125N sae2::URA3                           | pTP3684 (I96P Flag-SAE2 in pRS313)                       | 3A | this study                     |
| TP7774  | MAT $\alpha$ RAD5 leu2-3,112 trp1-1 ura3 can1 his3-11,15 ade2-1 mre11-H125N sae2::URA3                           | pTP3685 (E161P/K163P Flag-SAE2 in pRS313)                | 3A | this study                     |
| TP7775  | MAT $\alpha$ RAD5 leu2-3,112 trp1-1 ura3 can1 his3-11,15 ade2-1 mre11-H125N sae2::URA3                           | pTP3700 (D285P/K288P Flag-SAE2 in pRS313)                | 3A | this study                     |
| TP7852  | MAT $\alpha$ RAD5 leu2-3,112 trp1-1 ura3 can1 his3-11,15 ade2-1 sae2::URA3                                       | pRS425 (Christianson et al., 1992)                       | 3B | this study                     |
| TP7853  | MAT $\alpha$ RAD5 leu2-3,112 trp1-1 ura3 can1 his3-11,15 ade2-1 sae2::URA3                                       | wild-type Flag-SAE2 in 2 $\mu$ pRS425 (Kim et al., 2008) | 3B | this study                     |
| TP7986  | MAT $\alpha$ RAD5 leu2-3,112 trp1-1 ura3 can1 his3-11,15 ade2-1 sae2::URA3                                       | pTP3733 (D285P/K288P Flag-SAE2 in 2 $\mu$ pRS425)        | 3B | this study                     |
| TP7855  | MAT $\alpha$ RAD5 leu2-3,112 trp1-1 ura3 can1 his3-11,15 ade2-1 sae2::URA3                                       | pTP3851 (E161P/K163P Flag-SAE2 in 2 $\mu$ pRS425)        | 3B | this study                     |
| LSY0678 | MAT $\alpha$ RAD5 leu2-3,112 trp1-1 ura3 can1 his3-11,15 ade2-1                                                  |                                                          | 3D | L. Symington                   |
| LSY1397 | MAT $\alpha$ RAD5 leu2-3,112 trp1-1 ura3 can1 his3-11,15 ade2-1 mre11-H125N                                      |                                                          | 3D | L. Symington                   |
| TP7692  | MAT $\alpha$ RAD5 leu2-3,112 trp1-1 ura3 can1 his3-11,15 ade2-1 sae2::URA3                                       |                                                          | 3D | this study                     |
| TP8052  | MAT $\alpha$ RAD5 leu2-3,112 trp1-1 ura3 can1 his3-11,15 ade2-1 sae2-D285P/K288P                                 |                                                          | 3D | this study                     |
| TP7966  | MAT $\alpha$ RAD5 leu2-3,112 trp1-1 ura3 can1 his3-11,15 ade2-1 sae2-E161P/K163P                                 |                                                          | 3D | this study                     |
| TP8522  | MAT $\alpha$ RAD5 leu2-3,112 trp1-1 ura3 can1 his3-11,15 ade2-1 mre11-H125N sae2-E161P/K163P                     |                                                          | 3D | this study                     |
| TP8395  | MAT $\alpha$ RAD5 leu2-3,112 trp1-1 ura3 can1 his3-11,15 ade2-1 mre11-H125N sae2-D285P/K288P                     |                                                          | 3D | this study                     |
| TP8416  | MAT $\alpha$ RAD5 leu2-3,112 trp1-1 ura3 can1 his3-11,15 ade2-1 Ku70::KanMX sae2::URA3                           | pRS423 (Christianson et al., 1992)                       | 3F | this study                     |
| TP8417  | MAT $\alpha$ RAD5 leu2-3,112 trp1-1 ura3 can1 his3-11,15 ade2-1 Ku70::KanMX sae2::URA3                           | pTP1496 (wild-type Flag-SAE2 in pRS313)                  | 3F | this study                     |
| TP8418  | MAT $\alpha$ RAD5 leu2-3,112 trp1-1 ura3 can1 his3-11,15 ade2-1 Ku70::KanMX sae2::URA3                           | pTP3685 (E161P/K163P Flag-SAE2 in pRS313)                | 3F | this study                     |
| TP8419  | MAT $\alpha$ RAD5 leu2-3,112 trp1-1 ura3 can1 his3-11,15 ade2-1 Ku70::KanMX sae2::URA3                           | pTP3700 (D285P/K288P Flag-SAE2 in pRS313)                | 3F | this study                     |
| TP8420  | MAT $\alpha$ RAD5 leu2-3,112 trp1-1 ura3 can1 his3-11,15 ade2-1 Ku70::KanMX sae2::URA3                           | pTP3870 (E161P/K163P/D285P/K288P Flag-SAE2 in pRS313)    | 3F | this study                     |

|        |                                                                                                          |                                                                                               |          |                                   |
|--------|----------------------------------------------------------------------------------------------------------|-----------------------------------------------------------------------------------------------|----------|-----------------------------------|
| TP7983 | MATa RAD5 leu2-3,112 trp1-1 ura3 can1 his3-11,15 ade2-1 sae2::URA3                                       | pRS313 (Sikorski & Hieter, 1989)                                                              | 3F       | this study                        |
| JKM179 | MATα Δho hml::ADE1 hmr::ADE1 ade1-110 leu2,3-112 lys5 trp1::hisG ura3-52 ade3::GAL10:HO                  |                                                                                               |          | (Lee, Moore et al., 1998)         |
| TP5927 | MATα Δho hml::ADE1 hmr::ADE1 ade1-110 leu2,3-112 lys5 trp1::hisG ura3-52 ade3::GAL10:HO                  | pRS425 (Christianson et al., 1992)                                                            | 7A       | this study                        |
| TP5157 | MATα Δho hml::ADE1 hmr::ADE1 ade1-110 leu2,3-112 lys5 trp1::hisG ura3-52 ade3::GAL10:HO sae2::KMX        |                                                                                               |          | this study                        |
| TP5928 | MATα Δho hml::ADE1 hmr::ADE1 ade1-110 leu2,3-112 lys5 trp1::hisG ura3-52 ade3::GAL10:HO sae2::KMX        | pRS425 (Christianson et al., 1992)                                                            | 6B-D, 7A | this study                        |
| TP7701 | MATα Δho hml::ADE1 hmr::ADE1 ade1-110 leu2,3-112 lys5 trp1::hisG ura3-52 ade3::GAL10:HO sae2::KMX        | wild-type Flag- <i>SAE2</i> in 2μ pRS425 (Kim et al., 2008)                                   | 6B-D, 7A | this study                        |
| TP7696 | MATα Δho hml::ADE1 hmr::ADE1 ade1-110 leu2,3-112 lys5 trp1::hisG ura3-52 ade3::GAL10:HO sae2::KMX        | pTP3733 (D285P/K288P Flag- <i>SAE2</i> in 2μ pRS425)                                          | 6B-D, 7A | this study                        |
| TP7697 | MATα Δho hml::ADE1 hmr::ADE1 ade1-110 leu2,3-112 lys5 trp1::hisG ura3-52 ade3::GAL10:HO sae2::KMX        | pTP3851 (E161P/K163P Flag- <i>SAE2</i> in 2μ pRS425)                                          | 6B-D, 7A | this study                        |
| TP7943 | MATα Δho hml::ADE1 hmr::ADE1 ade1-110 leu2,3-112 lys5 trp1::hisG ura3-52 ade3::GAL10:HO sae2::KMX        | pTP3871 (E161P/K163P/D285P/K288P Flag- <i>SAE2</i> in 2μ pRS425)                              | 7A       | this study                        |
| YMV80  | MAT::hisG hml::ADE1 hmr::ADE1 ade1 lys5 ura3-52 trp1 ho ade3::GAL-HO leu2::cs                            |                                                                                               |          | (Vaze, Pellicoli et al., 2002)    |
| TP6028 | MAT::hisG hml::ADE1 hmr::ADE1 ade1 lys5 ura3-52 trp1 ho ade3::GAL-HO leu2::cs                            | pRS425 (Christianson et al., 1992)                                                            | 6E       | this study                        |
| TP6023 | MAT::hisG hml::ADE1 hmr::ADE1 ade1 lys5 ura3-52 trp1 ho ade3::GAL-HO leu2::cs sae2::URA3                 |                                                                                               |          | this study                        |
| TP7703 | MAT::hisG hml::ADE1 hmr::ADE1 ade1 lys5 ura3-52 trp1 ho ade3::GAL-HO leu2::cs sae2::URA3                 | pRS425 (Christianson et al., 1992)                                                            | 6E       | this study                        |
| TP6030 | MAT::hisG hml::ADE1 hmr::ADE1 ade1 lys5 ura3-52 trp1 ho ade3::GAL-HO leu2::cs sae2::URA3                 | wild-type Flag- <i>SAE2</i> in 2μ pRS425 (Kim et al., 2008)                                   | 6E       | this study                        |
| TP7695 | MAT::hisG hml::ADE1 hmr::ADE1 ade1 lys5 ura3-52 trp1 ho ade3::GAL-HO leu2::cs sae2::URA3                 | pTP3851 (E161P/K163P Flag- <i>SAE2</i> in 2μ pRS425)                                          | 6E       | this study                        |
| TP7694 | MAT::hisG hml::ADE1 hmr::ADE1 ade1 lys5 ura3-52 trp1 ho ade3::GAL-HO leu2::cs sae2::URA3                 | pTP3733 (D285P/K288P Flag- <i>SAE2</i> in 2μ pRS425)                                          | 6E       | this study                        |
| ALE94  | MATa ade5-1 his7-2 leu2-3,112:: p305L3 (LEU2) trp1-289 ura3-D, lys2::AluIR                               |                                                                                               |          | (Lobachev, Gordenin et al., 2002) |
| TP2464 | MATa ade5-1 his7-2 leu2-3,112:: p305L3 (LEU2) trp1-289 ura3-D, lys2::AluIR sae2::KMX                     |                                                                                               |          | this study                        |
| TP3226 | MATa ade5-1 HIS7 leu2-3,112:: p305L3 (LEU2) trp1-289 ura3-D, lys2::AluIR sae2::KMX his3::TRP1            |                                                                                               |          | this study                        |
| TP7699 | MATa ade5-1 HIS7 leu2-3,112:: p305L3 (LEU2) trp1-289 ura3-D, lys2::AluIR sae2::KMX his3::TRP1 mre11::HPH |                                                                                               |          | this study                        |
| TP7872 | MATa ade5-1 HIS7 leu2-3,112:: p305L3 (LEU2) trp1-289 ura3-D, lys2::AluIR sae2::KMX his3::TRP1 mre11::HPH | pTP165 (wild-type <i>MRE11</i> in pRS316)                                                     |          | this study                        |
| TP7892 | MATa ade5-1 HIS7 leu2-3,112:: p305L3 (LEU2) trp1-289 ura3-D, lys2::AluIR sae2::KMX his3::TRP1 mre11::HPH | pTP165 (wild-type <i>MRE11</i> in pRS316) + pRS313                                            | 7B       | this study                        |
| TP7893 | MATa ade5-1 HIS7 leu2-3,112:: p305L3 (LEU2) trp1-289 ura3-D, lys2::AluIR sae2::KMX his3::TRP1 mre11::HPH | pTP165 (wild-type <i>MRE11</i> in pRS316) + pTP1496 (wild-type Flag- <i>SAE2</i> in pRS313)   | 7B       | this study                        |
| TP7894 | MATa ade5-1 HIS7 leu2-3,112:: p305L3 (LEU2) trp1-289 ura3-D, lys2::AluIR sae2::KMX his3::TRP1 mre11::HPH | pTP165 (wild-type <i>MRE11</i> in pRS316) + pTP3685 (E161P/K163P Flag- <i>SAE2</i> in pRS313) | 7B       | this study                        |
| TP7895 | MATa ade5-1 HIS7 leu2-3,112:: p305L3 (LEU2) trp1-289 ura3-D, lys2::AluIR sae2::KMX his3::TRP1 mre11::HPH | pTP165 (wild-type <i>MRE11</i> in pRS316) + pTP3700 (D285P/K288P Flag- <i>SAE2</i> in pRS313) | 7B       | this study                        |
| TP7871 | MATa ade5-1 HIS7 leu2-3,112:: p305L3 (LEU2) trp1-289 ura3-D, lys2::AluIR sae2::KMX his3::TRP1 mre11::HPH | pTP178 ( <i>H125N mre11</i> in pRS316)                                                        |          |                                   |
| TP7888 | MATa ade5-1 HIS7 leu2-3,112:: p305L3 (LEU2) trp1-289 ura3-D, lys2::AluIR sae2::KMX his3::TRP1 mre11::HPH | pTP178 ( <i>H125N mre11</i> in pRS316) + pRS313                                               | 7B       | this study                        |
| TP7889 | MATa ade5-1 HIS7 leu2-3,112:: p305L3 (LEU2) trp1-289 ura3-D, lys2::AluIR sae2::KMX his3::TRP1 mre11::HPH | pTP178 ( <i>H125N mre11</i> in pRS316) + pTP1496 (wild-type Flag- <i>SAE2</i> in pRS313)      | 7B       | this study                        |
| TP7890 | MATa ade5-1 HIS7 leu2-3,112:: p305L3 (LEU2) trp1-289 ura3-D, lys2::AluIR sae2::KMX his3::TRP1 mre11::HPH | pTP178 ( <i>H125N mre11</i> in pRS316) + pTP3685 (E161P/K163P Flag- <i>SAE2</i> in pRS313)    | 7B       | this study                        |
| TP7891 | MATa ade5-1 HIS7 leu2-3,112:: p305L3 (LEU2) trp1-289 ura3-D, lys2::AluIR sae2::KMX his3::TRP1 mre11::HPH | pTP178 ( <i>H125N mre11</i> in pRS316) + pTP3700 (D285P/K288P Flag- <i>SAE2</i> in pRS313)    | 7B       | this study                        |

|           |                                                                                                                              |                                                                                                                      |    |              |
|-----------|------------------------------------------------------------------------------------------------------------------------------|----------------------------------------------------------------------------------------------------------------------|----|--------------|
| TP7850    | MAT $\alpha$ $\Delta$ ho hml::ADE1 hmr::ADE1 ade1-110 leu2,3-112 lys5 trp1::hisG ura3-52 ade3::GAL10:HO sae2::KMX mre11::HPH |                                                                                                                      |    |              |
| TP7945    | MAT $\alpha$ $\Delta$ ho hml::ADE1 hmr::ADE1 ade1-110 leu2,3-112 lys5 trp1::hisG ura3-52 ade3::GAL10:HO sae2::KMX mre11::HPH | pTP165 (wild-type <i>MRE11</i> in pRS316) + pRS425                                                                   | 7C | this study   |
| TP7949    | MAT $\alpha$ $\Delta$ ho hml::ADE1 hmr::ADE1 ade1-110 leu2,3-112 lys5 trp1::hisG ura3-52 ade3::GAL10:HO sae2::KMX mre11::HPH | pTP165 (wild-type <i>MRE11</i> in pRS316) + wild-type Flag- <i>SAE2</i> in 2 $\mu$ pRS425 (Kim et al., 2008)         | 7C | this study   |
| TP7957    | MAT $\alpha$ $\Delta$ ho hml::ADE1 hmr::ADE1 ade1-110 leu2,3-112 lys5 trp1::hisG ura3-52 ade3::GAL10:HO sae2::KMX mre11::HPH | pTP165 (wild-type <i>MRE11</i> in pRS316) + pTP3851 (E161P/K163P Flag- <i>SAE2</i> in 2 $\mu$ pRS425)                | 7C | this study   |
| TP7953    | MAT $\alpha$ $\Delta$ ho hml::ADE1 hmr::ADE1 ade1-110 leu2,3-112 lys5 trp1::hisG ura3-52 ade3::GAL10:HO sae2::KMX mre11::HPH | pTP165 (wild-type <i>MRE11</i> in pRS316) + pTP3733 (D285P/K288P Flag- <i>SAE2</i> in 2 $\mu$ pRS425)                | 7C | this study   |
| TP7961    | MAT $\alpha$ $\Delta$ ho hml::ADE1 hmr::ADE1 ade1-110 leu2,3-112 lys5 trp1::hisG ura3-52 ade3::GAL10:HO sae2::KMX mre11::HPH | pTP165 (wild-type <i>MRE11</i> in pRS316) + pTP3871 (E161P/K163P/D285P/K288P Flag- <i>SAE2</i> in 2 $\mu$ pRS425)    | 7C | this study   |
| TP7946    | MAT $\alpha$ $\Delta$ ho hml::ADE1 hmr::ADE1 ade1-110 leu2,3-112 lys5 trp1::hisG ura3-52 ade3::GAL10:HO sae2::KMX mre11::HPH | pTP178 ( <i>H125N mre11</i> in pRS316) + pRS425                                                                      | 7C | this study   |
| TP7950    | MAT $\alpha$ $\Delta$ ho hml::ADE1 hmr::ADE1 ade1-110 leu2,3-112 lys5 trp1::hisG ura3-52 ade3::GAL10:HO sae2::KMX mre11::HPH | pTP178 ( <i>H125N mre11</i> in pRS316) + wild-type Flag- <i>SAE2</i> in 2 $\mu$ pRS425 (Kim et al., 2008)            | 7C | this study   |
| TP7958    | MAT $\alpha$ $\Delta$ ho hml::ADE1 hmr::ADE1 ade1-110 leu2,3-112 lys5 trp1::hisG ura3-52 ade3::GAL10:HO sae2::KMX mre11::HPH | pTP178 ( <i>H125N mre11</i> in pRS316) + pTP3851 (E161P/K163P Flag- <i>SAE2</i> in 2 $\mu$ pRS425)                   | 7C | this study   |
| TP7954    | MAT $\alpha$ $\Delta$ ho hml::ADE1 hmr::ADE1 ade1-110 leu2,3-112 lys5 trp1::hisG ura3-52 ade3::GAL10:HO sae2::KMX mre11::HPH | pTP178 ( <i>H125N mre11</i> in pRS316) + pTP3733 (D285P/K288P Flag- <i>SAE2</i> in 2 $\mu$ pRS425)                   | 7C | this study   |
| TP7962    | MAT $\alpha$ $\Delta$ ho hml::ADE1 hmr::ADE1 ade1-110 leu2,3-112 lys5 trp1::hisG ura3-52 ade3::GAL10:HO sae2::KMX mre11::HPH | pTP178 ( <i>H125N mre11</i> in pRS316) + pTP3871 (E161P/K163P/D285P/K288P Flag- <i>SAE2</i> in 2 $\mu$ pRS425)       | 7C | this study   |
| TP7960    | MAT $\alpha$ $\Delta$ ho hml::ADE1 hmr::ADE1 ade1-110 leu2,3-112 lys5 trp1::hisG ura3-52 ade3::GAL10:HO sae2::KMX mre11::HPH | pTP3902 ( <i>H125N/H37Y mre11</i> in pRS316) + pTP3851 (E161P/K163P Flag- <i>SAE2</i> in 2 $\mu$ pRS425)             | 7C | this study   |
| TP7964    | MAT $\alpha$ $\Delta$ ho hml::ADE1 hmr::ADE1 ade1-110 leu2,3-112 lys5 trp1::hisG ura3-52 ade3::GAL10:HO sae2::KMX mre11::HPH | pTP3902 ( <i>H125N/H37Y mre11</i> in pRS316) + pTP3871 (E161P/K163P/D285P/K288P Flag- <i>SAE2</i> in 2 $\mu$ pRS425) | 7C | this study   |
| TP7948    | MAT $\alpha$ $\Delta$ ho hml::ADE1 hmr::ADE1 ade1-110 leu2,3-112 lys5 trp1::hisG ura3-52 ade3::GAL10:HO sae2::KMX mre11::HPH | pTP3902 ( <i>H125N/H37Y mre11</i> in pRS316) + pRS425                                                                | 7C | this study   |
| TP7951    | MAT $\alpha$ $\Delta$ ho hml::ADE1 hmr::ADE1 ade1-110 leu2,3-112 lys5 trp1::hisG ura3-52 ade3::GAL10:HO sae2::KMX mre11::HPH | pTP3902 ( <i>H125N/H37Y mre11</i> in pRS316) + wild-type Flag- <i>SAE2</i> in 2 $\mu$ pRS425 (Kim et al., 2008)      | 7C | this study   |
| TP7947    | MAT $\alpha$ $\Delta$ ho hml::ADE1 hmr::ADE1 ade1-110 leu2,3-112 lys5 trp1::hisG ura3-52 ade3::GAL10:HO sae2::KMX mre11::HPH | pTP3880 ( <i>H37Y mre11</i> in pRS316) + pRS425                                                                      | 7C | this study   |
| TP7963    | MAT $\alpha$ $\Delta$ ho hml::ADE1 hmr::ADE1 ade1-110 leu2,3-112 lys5 trp1::hisG ura3-52 ade3::GAL10:HO sae2::KMX mre11::HPH | pTP3880 ( <i>H37Y mre11</i> in pRS316) + pTP3871 (E161P/K163P/D285P/K288P Flag- <i>SAE2</i> in 2 $\mu$ pRS425)       | 7C | this study   |
| X2570-12A | MATalpha RAD5 leu2-3,112 trp1-1 ura3 can1 his3-11,15 ade2-1 Rad53-Flag::LEU2                                                 |                                                                                                                      |    | Xiaolan Zhao |
| TP5654    | MATalpha RAD5 leu2-3,112 trp1-1 ura3 can1 his3-11,15 ade2-1 Rad53-Flag::LEU2 sae2::KMX                                       |                                                                                                                      |    | this study   |
| TP5675    | MATalpha RAD5 leu2-3,112 trp1-1 ura3 can1 his3-11,15 ade2-1 Rad53-Flag::LEU2 sae2::KMX sml1::HPH                             |                                                                                                                      |    | this study   |
| TP5702    | MATalpha RAD5 leu2-3,112 trp1-1 ura3 can1 his3-11,15 ade2-1 Rad53-Flag::LEU2 sae2::KMX sml1::HPH mec1::NAT                   |                                                                                                                      |    | this study   |
| TP7973    | MATalpha RAD5 leu2-3,112 trp1-1 ura3 can1 his3-11,15 ade2-1 Rad53-Flag::LEU2 sae2::KMX sml1::HPH mec1::NAT                   | pRS313 (Sikorski & Hieter, 1989)                                                                                     | 7D | this study   |
| TP7974    | MATalpha RAD5 leu2-3,112 trp1-1 ura3 can1 his3-11,15 ade2-1 Rad53-Flag::LEU2 sae2::KMX sml1::HPH mec1::NAT                   | pTP1496 (wild-type Flag- <i>SAE2</i> in pRS313)                                                                      | 7D | this study   |
| TP7975    | MATalpha RAD5 leu2-3,112 trp1-1 ura3 can1 his3-11,15 ade2-1 Rad53-Flag::LEU2 sae2::KMX sml1::HPH mec1::NAT                   | pTP3685 (E161P/K163P Flag- <i>SAE2</i> in pRS313)                                                                    | 7D | this study   |
| TP7976    | MATalpha RAD5 leu2-3,112 trp1-1 ura3 can1 his3-11,15 ade2-1 Rad53-Flag::LEU2 sae2::KMX sml1::HPH mec1::NAT                   | pTP3700 (D285P/K288P Flag- <i>SAE2</i> in pRS313)                                                                    | 7D | this study   |
| TP7977    | MATalpha RAD5 leu2-3,112 trp1-1 ura3 can1 his3-11,15 ade2-1 Rad53-Flag::LEU2 sae2::KMX sml1::HPH mec1::NAT                   | pTP3870 (E161P/K163P/D285P/K288P Flag- <i>SAE2</i> in pRS313)                                                        | 7D | this study   |
| TP7978    | MATalpha RAD5 leu2-3,112 trp1-1 ura3 can1 his3-11,15 ade2-1 Rad53-Flag::LEU2 sml1::HPH                                       | pRS313 (Sikorski & Hieter, 1989)                                                                                     | 7D | this study   |
| TP7852    | MATa RAD5 leu2-3,112 trp1-1 ura3 can1 his3-11,15 ade2-1 sae2::URA3                                                           | pRS425 (Christianson et al., 1992)                                                                                   |    | this study   |
| TP7853    | MATa RAD5 leu2-3,112 trp1-1 ura3 can1 his3-11,15 ade2-1 sae2::URA3                                                           | wild-type Flag- <i>SAE2</i> in 2 $\mu$ pRS425 (Kim et al., 2008)                                                     |    | this study   |
| TP7854    | MATa RAD5 leu2-3,112 trp1-1 ura3 can1 his3-11,15 ade2-1 sae2::URA3                                                           | pTP3733 (D285P/K288P Flag- <i>SAE2</i> in 2 $\mu$ pRS425)                                                            |    | this study   |

|        |                                                                                    |                                                          |    |                          |
|--------|------------------------------------------------------------------------------------|----------------------------------------------------------|----|--------------------------|
| TP7855 | MATa RAD5 leu2-3,112 trp1-1 ura3 can1 his3-11,15 ade2-1 sae2::URA3                 | pTP3851 (E161P/K163P Flag-SAE2 in 2 $\mu$ pRS425)        |    | this study               |
| BY4742 | MATalpha his3 $\Delta$ 1 leu2 $\Delta$ 0 lys2 $\Delta$ 0 ura3 $\Delta$ 0           |                                                          |    | (Brachmann et al., 1998) |
| TP2224 | MATalpha his3 $\Delta$ 1 leu2 $\Delta$ 0 lys2 $\Delta$ 0 ura3 $\Delta$ 0 sae2::KMX |                                                          |    | this study               |
| TP7861 | diploid from TP2224 and TP7852                                                     | pRS425 (Christianson et al., 1992)                       | 8A | this study               |
| TP7862 | diploid from TP2224 and TP7853                                                     | wild-type Flag-SAE2 in 2 $\mu$ pRS425 (Kim et al., 2008) | 8A | this study               |
| TP7863 | diploid from TP2224 and TP7854                                                     | pTP3733 (D285P/K288P Flag-SAE2 in 2 $\mu$ pRS425)        | 8A | this study               |
| TP7864 | diploid from TP2224 and TP7855                                                     | pTP3851 (E161P/K163P Flag-SAE2 in 2 $\mu$ pRS425)        | 8A | this study               |
| TP8055 | diploid from TP2224 and LSY0678                                                    |                                                          | 8B | this study               |
| TP8056 | diploid from TP2224 and TP7692                                                     |                                                          | 8B | this study               |
| TP8057 | diploid from TP2224 and TP7966                                                     |                                                          | 8B | this study               |
| TP8059 | diploid from TP2224 and TP8052                                                     |                                                          | 8B | this study               |

## References

- Brachmann CB, Davies A, Cost GJ, Caputo E, Li J, Hieter P, Boeke JD (1998) Designer deletion strains derived from *Saccharomyces cerevisiae* S288C: a useful set of strains and plasmids for PCR-mediated gene disruption and other applications. *Yeast* 14: 115-32
- Budd ME, Campbell JL (1995) A yeast gene required for DNA replication encodes a protein with homology to DNA helicases. *Proceedings of the National Academy of Sciences of the United States of America* 92: 7642-6
- Budd ME, Campbell JL (2009) Interplay of Mre11 nuclease with Dna2 plus Sgs1 in Rad51-dependent recombinational repair. *PLoS one* 4: e4267
- Christianson TW, Sikorski RS, Dante M, Shero JH, Hieter P (1992) Multifunctional yeast high-copy-number shuttle vectors. *Gene* 110: 119-22
- Fu Q, Chow J, Bernstein KA, Makharashvili N, Arora S, Lee CF, Person MD, Rothstein R, Paull TT (2014) Phosphorylation-regulated transitions in an oligomeric state control the activity of the sae2 DNA repair enzyme. *Mol Cell Biol* 34: 778-93
- Kim HS, Vijayakumar S, Reger M, Harrison JC, Haber JE, Weil C, Petrini JH (2008) Functional interactions between Sae2 and the Mre11 complex. *Genetics* 178: 711-23
- Krogh BO, Llorente B, Lam A, Symington LS (2005) Mutations in Mre11 Phosphoesterase Motif I That Impair *Saccharomyces cerevisiae* Mre11-Rad50-Xrs2 Complex Stability in Addition to Nuclease Activity. *Genetics* 171: 1561-70
- Lee SE, Moore JK, Holmes A, Umezū K, Kolodner RD, Haber JE (1998) *Saccharomyces* Ku70, mre11/rad50 and RPA proteins regulate adaptation to G2/M arrest after DNA damage. *Cell* 94: 399-409
- Lobachev KS, Gordenin DA, Resnick MA (2002) The Mre11 complex is required for repair of hairpin-capped double-strand breaks and prevention of chromosome rearrangements. *Cell* 108: 183-93.
- Sikorski RS, Hieter P (1989) A system of shuttle vectors and yeast host strains designed for efficient manipulation of DNA in *Saccharomyces cerevisiae*. *Genetics* 122: 19-27.
- Vaze MB, Pellicoli A, Lee SE, Ira G, Liberi G, Arbel-Eden A, Foiani M, Haber JE (2002) Recovery from checkpoint-mediated arrest after repair of a double-strand break requires Srs2 helicase. *Mol Cell* 10: 373-85
- Winzeler EA, Shoemaker DD, Astromoff A, Liang H, Anderson K, Andre B, Bangham R, Benito R, Boeke JD, Bussey H, Chu AM, Connelly C, Davis K, Dietrich F, Dow SW, El Bakkoury M, Foury F, Friend SH, Gentalen E, Giaever G et al. (1999) Functional characterization of the *S. cerevisiae* genome by gene deletion and parallel analysis. *Science* 285: 901-6
